# Supplementary material
Source: publisher figshare collection journal article supplement (https://acs.figshare.com/ndownloader/files/4714621)
Supplement: Supplementary file 1 [file 4714621]

# ***p*-Nitromandelic Acid (Pnm) as a Highly Acid-Stable Safety-Catch Linker for Solid Phase Synthesis of Peptide and Depsipeptide Acids**

Albert Isidro-Llobet, Mercedes Alvarez, Klaus Burger, Jan Spengler, Fernando Albericio,

albericio@pcb.ub.es, jspengler@pcb.ub.es

## **Supporting Information**

### **General**

#### **Commercial compounds**

Commercial grade reagents and solvents were used without further purification. AM-resin (aminomethylated polystyrene, 100-200 mesh,  $f = 1.1$  mmol/g), PyBOP for in situ neutralization and HOBt were purchased from NovaBiochem, lactic acid, leucic acid and diisopropylcarbodiimide (DIC) from Aldrich, Boc-amino acids and Fmoc-Leu-OH from Iris Biotech and DIEA from Merck.

### **Apparatus**

Analytical HPLC was carried out with a Waters instrument on a C8-column. Linear gradients (given in the table) of CH<sub>3</sub>CN (0.036% TFA) into H<sub>2</sub>O (0.045% TFA) were run at a flow rate of 1.0 mL/min. UV detection was performed at 220 nm. The mass signals in the HPLC-MS spectra were obtained with an electrospray detector (Waters micromass ZQ). NMR spectra were acquired with a Mercury-400 spectrometer (<sup>1</sup>H at 400.125 MHz, <sup>13</sup>C at 100.625 MHz with TMS as internal reference) (High-field NMR Unit, Barcelona Science Park).

The following abbreviations are used to indicate multiplicity: s, singlet; d, doublet, dd, double doublet; t, triplet; dt, double triplet; m, multiplet, br s, broad signal. Microwave experiments were performed with a CEM Discover apparatus. Temperature was measured with a non-contact infrared sensor.

## 2,2-Bis(trifluoromethyl)-1,3-dioxolan-5-(4-nitrophenyl)-4-one (HFA-Pnm)

*p*-Nitromandelic acid was synthesized from *p*-nitrobenzaldehyde (32.5 mmol, 4.9 g) and potassium cyanide. The crude nitrile was transformed in the methyl ester as described earlier.<sup>1</sup> The crude methyl ester (3.8 g) was then saponified by refluxing with glacial HOAc / conc. HCl mixture (5 : 1), until no starting material was detected by TLC. Note: saponification with LiOH gave no desired product. After evaporation, a mixture of products was obtained, which was dissolved in DMSO and directly subjected to reaction with HFA. The extracted product (1.7 g) was purified by flash chromatography (hexane / ethyl acetate 4 : 1,  $R_f$  = 0.6) 2,2-bis(trifluoromethyl)-1,3-dioxolan-5-(4-nitrophenyl)-4-one [HFA(Pnm), 0.54 g, 5% overall yield from *p*-nitrobenzaldehyde]. Its spectroscopical data are in agreement with those already described for such compounds.<sup>2</sup> <sup>1</sup>H NMR (CDCl<sub>3</sub>):  $\delta$  (ppm) = 5.75 (s, 1H), 7.69 (d,  $J$  = 8.67 Hz, 2H), 8.34 (d,  $J$  = 8.91 Hz, 2H). <sup>13</sup>C NMR (CDCl<sub>3</sub>):  $\delta$  (ppm) = 74.9, 97.8 (m), 118.8 (q,  $J$  = 285 Hz), 119.5 (q,  $J$  = 288 Hz), 124.3, 126.9, 137.0, 148.9, 165.1. <sup>19</sup>F NMR (CDCl<sub>3</sub>):  $\delta$  (ppm) = -81.0 (q,  $J$  = 7.75 Hz), -80.45 (q,  $J$  = 7.75 Hz). IR (film):  $\nu$  = 1855, 1531, 1352, 1238, 1134 cm<sup>-1</sup>.

<sup>1</sup>H NMR:

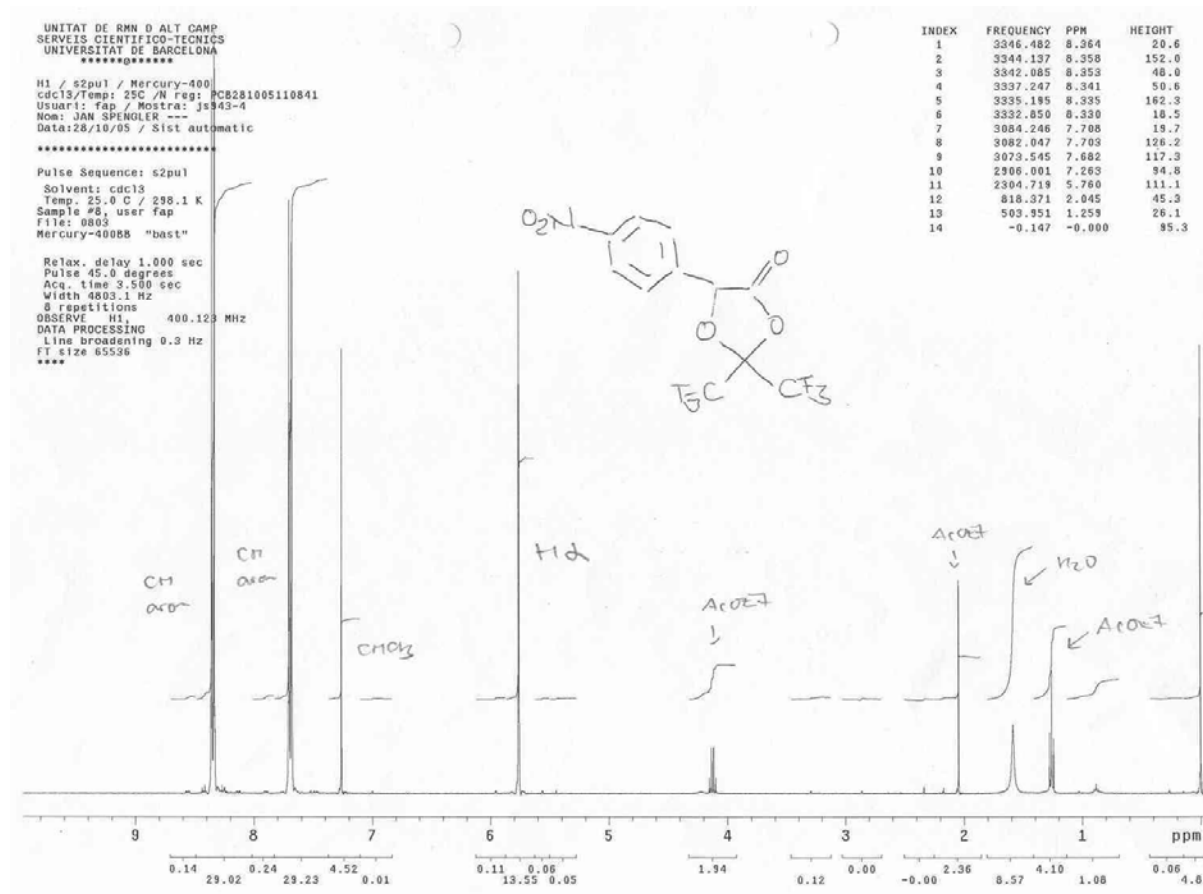

# <sup>13</sup>C NMR:

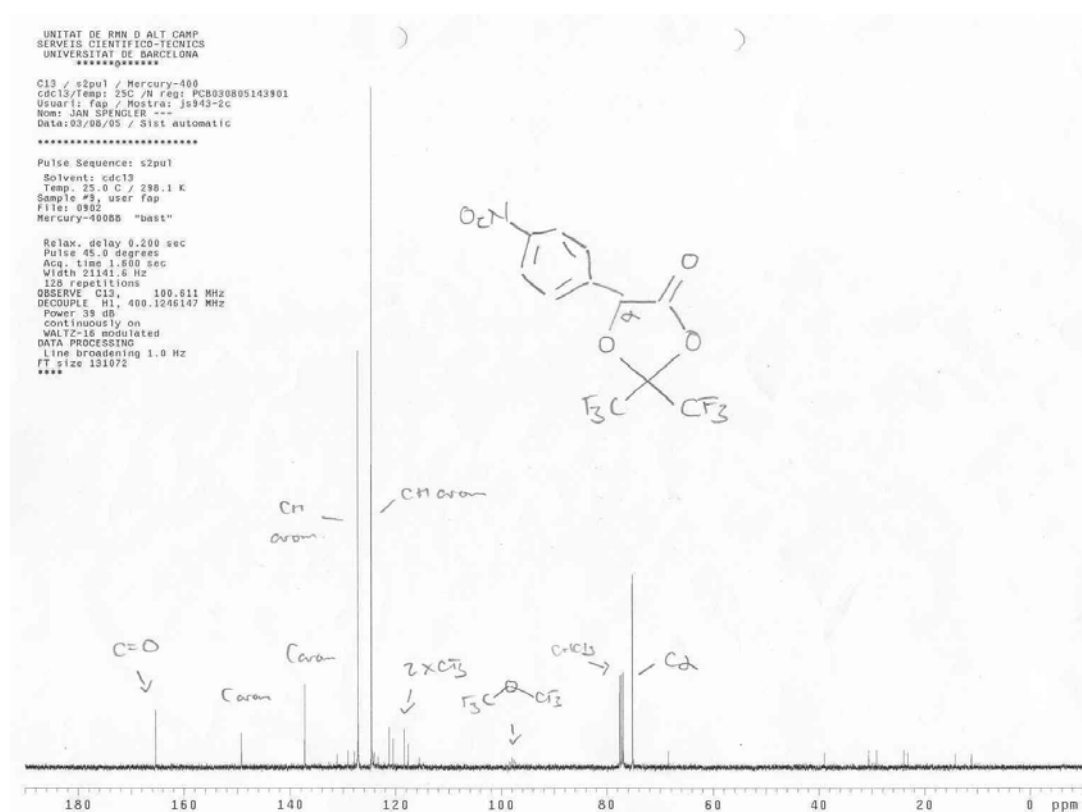

# <sup>19</sup>F NMR:

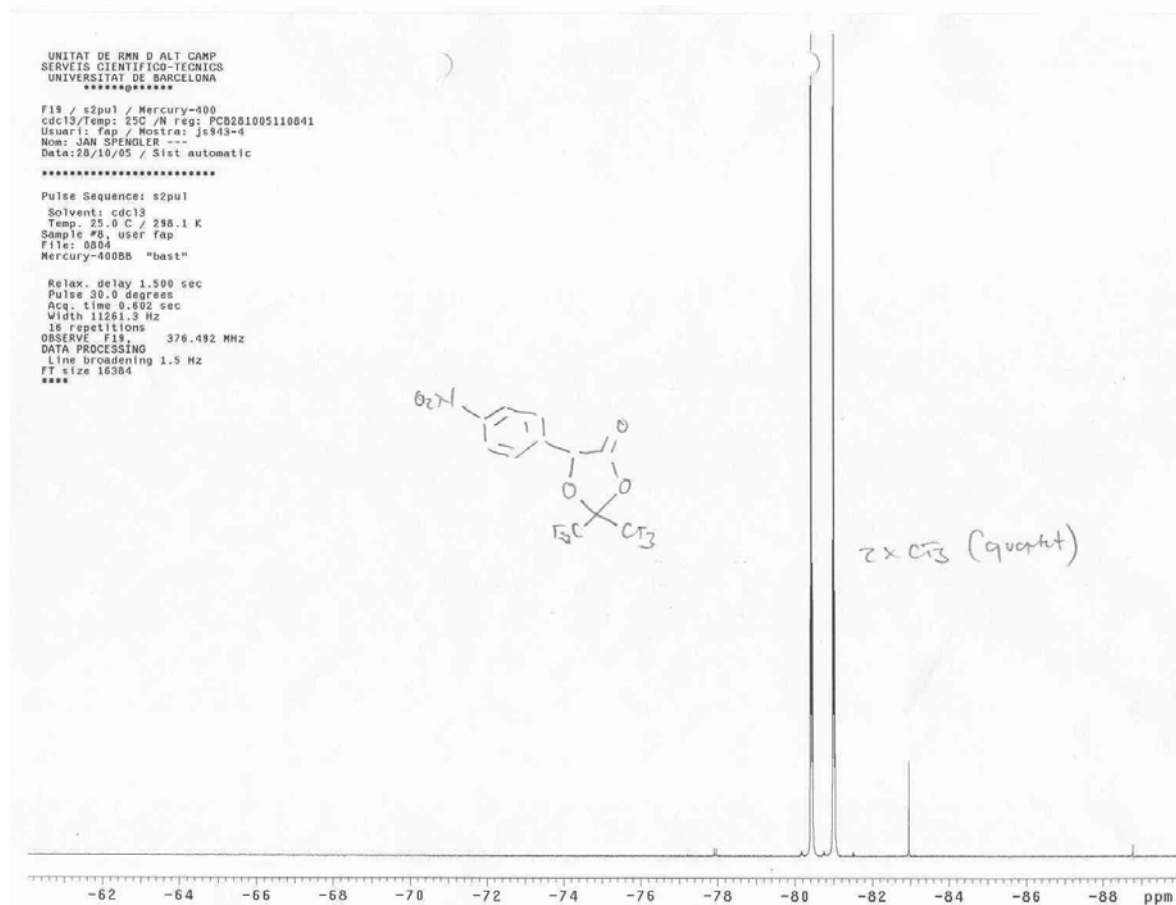

IR (film):

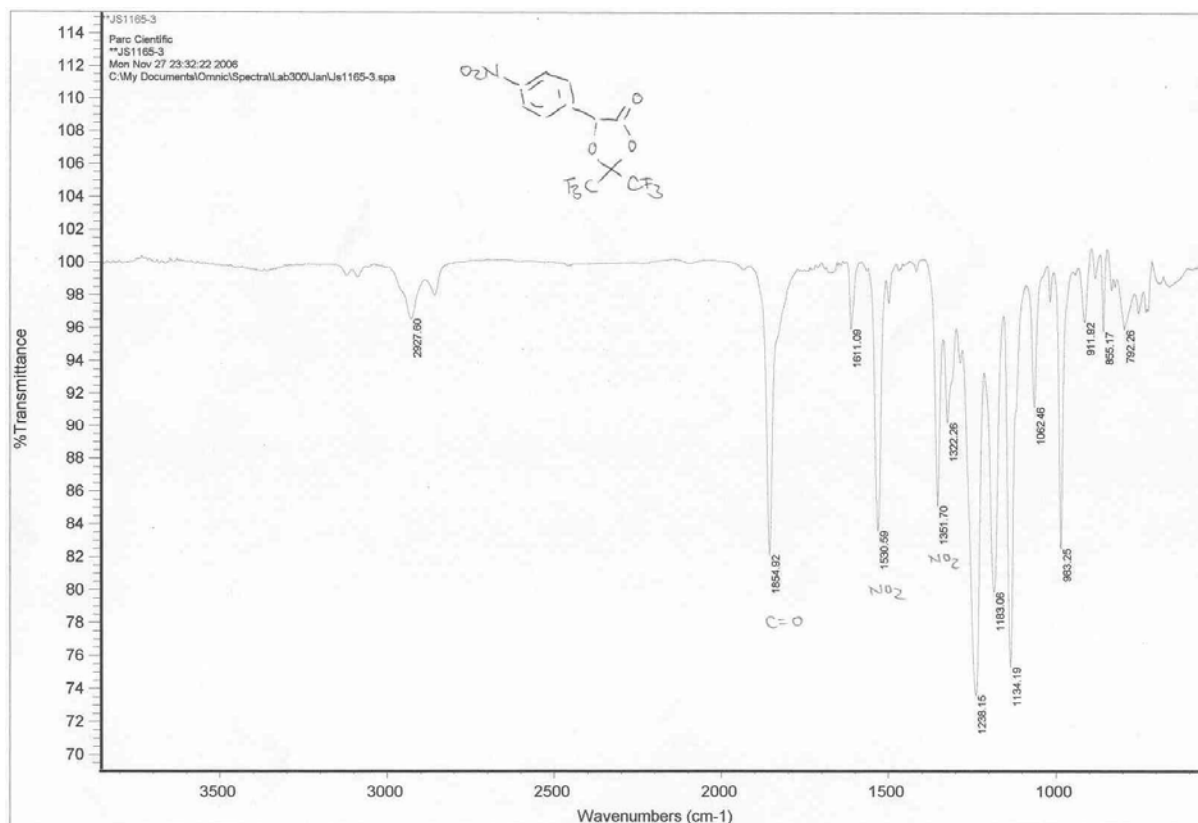

### Preparation of H-Pnm-AM-resin and depsipeptide synthesis

4 eq of HFA-Pnm were dissolved in THF and added to aminomethylated polystyrene (which turned blue) and the mixture was left to shake until the ninhydrin-test was negative. The filtrate and washing solutions with the excess of HFA-Pnm were then evaporated and stored for future reuse. The depsipeptides were then synthesized by standard protocols. Attachment of the first amino acid: symmetric anhydride generated with DIC, cat. amounts of DMAP. Third position after an ester bond: in-situ neutralization using the PyBOP-reagent.<sup>3</sup> Lactic and leucic acid were coupled without  $\alpha$ -OH protection schemes with DIC/HOBt.

For side-chain deprotection:

The resins were treated with 150  $\mu$ L of thioanisol at 0 °C followed by addition of 1 mL of TFA and 10 min of stirring. 100  $\mu$ L of Trifluoromethanesulfonic acid (TFMSA) were then added and the resins were stirred 2 h at rt. Finally, the following washings were carried out: TFA (3 x 1 min), DCM (5 x 1 min), isopropanol (5 x 1 min) and DMF (5 x 1min).

For final cleavage, the resins were treated with:

i) 6 M SnCl<sub>2</sub>, 1.6 mM HCl/dioxane in DMF, 1 h at rt.

Washings: 5 x 1 min. with DMF and 5 x 30 seconds with dioxane.

ii) 5% TFA in dioxane 1h at 50 °C (Microwave heating).

**Ac-Lys(2ClZ)-Phe-Leu-Lac-Val-OH (5b) :**

HRMS (ESI-MS, ES<sup>+</sup>): C<sub>39</sub>H<sub>53</sub>ClN<sub>5</sub>O<sub>10</sub> (M+H<sup>+</sup>) calcd.: 789.34721, found: 789.36602.

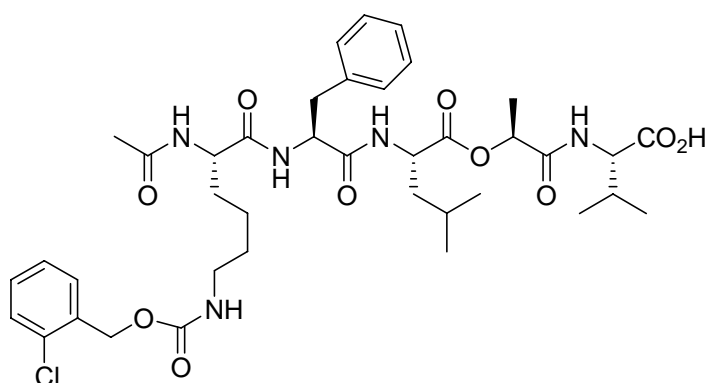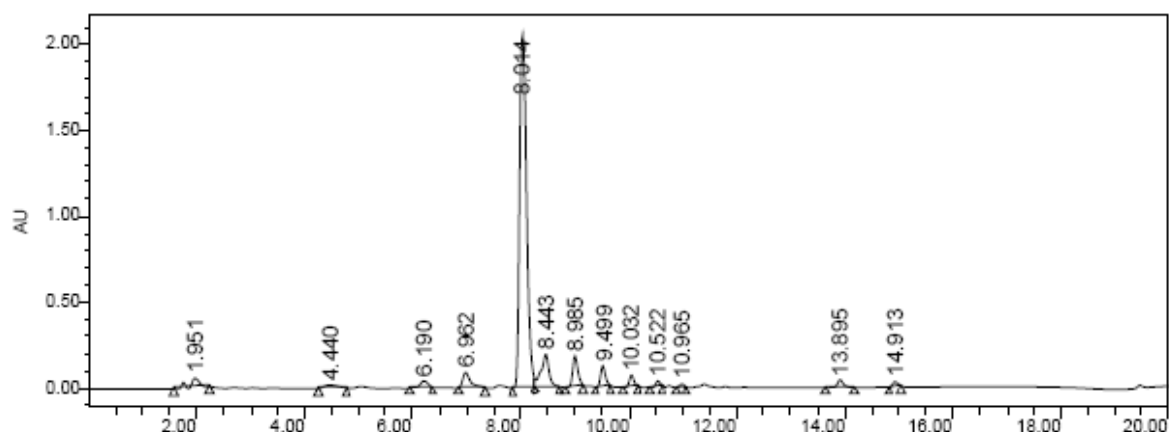

The depsipeptide **5b** (Ac-Lys(2ClZ)-Phe-Leu-Lac-Val-OH) (25 mg) was purified by semipreparative HPLC

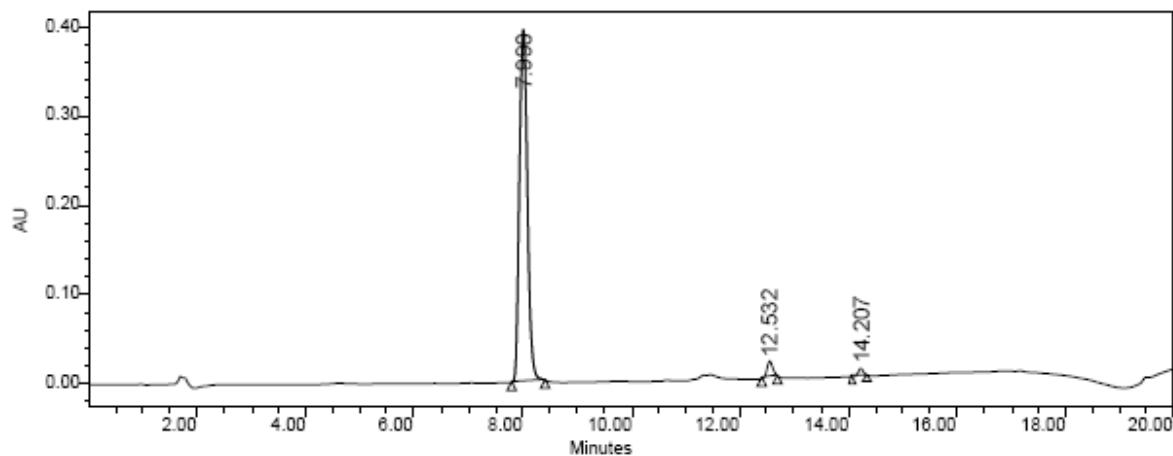

$^1\text{H}$  NMR of **5b** (400 MHz, DMSO):

8.21 (d,  $J = 7.79$  Hz, NH from Leu), 8.06 (d,  $J = 8.62$  Hz, NH from Val), 7.88 (m, 2H, NH from Phe and Lys), 7.45 (dd,  $J = 9.2$  Hz,  $J' = 5.6$  Hz, 2 CH ar.), 7.35 (m, 2 CH ar.), 7.28 (t,  $J = 5.5$  Hz,  $\epsilon\text{NH}$  from Lys), 7.2 (m, 4 CH ar.), 7.16 (m, CH ar.), 5.06 (s,  $\text{CH}_2$  from 2-Cl-Z), 5.03 (q,  $J = 6.8$  Hz, CH from lactic acid), 4.50 (m,  $\alpha\text{CH}$  from Phe), 4.28 (m,  $\alpha\text{CH}$  from Leu), 4.10 (m,  $\alpha\text{CH}$  from Val and Lys), 3.02 (dd,  $J = 14.0$  Hz,  $J = 4.0$  Hz, 1H,  $\text{CH}_2$  from Phe), 2.91 (m,  $\epsilon\text{CH}_2$  from Lys), 2.76 (dd,  $J = 14.0$  Hz,  $J = 9.8$  Hz, 1H,  $\text{CH}_2$  from Phe), 2.05 (m,  $\beta\text{CH}_2$  from Val), 1.79 (s, acetyl  $\text{CH}_3$ ), 1.66 (m,  $\beta\text{CH}$  Leu), 1.56 (m,  $\text{CH}_2$  from Leu), 1.45 (m, 1H,  $\beta\text{CH}_2$  from Lys), 1.36 (m, 1H,  $\beta\text{CH}_2$  from Lys), 1.31 (d,  $J = 6.8$  Hz,  $\text{CH}_3$  from lactic acid), 1.31 (m,  $\delta\text{CH}_2$  from Lys), 1.12 (m,  $\gamma\text{CH}_2$  from Lys), 0.87 (m, 9H, 2 $\text{CH}_3$  from Val,  $\text{CH}_3$  from Leu), 0.81 (d,  $J = 6.3$  Hz,  $\text{CH}_3$  from Leu).

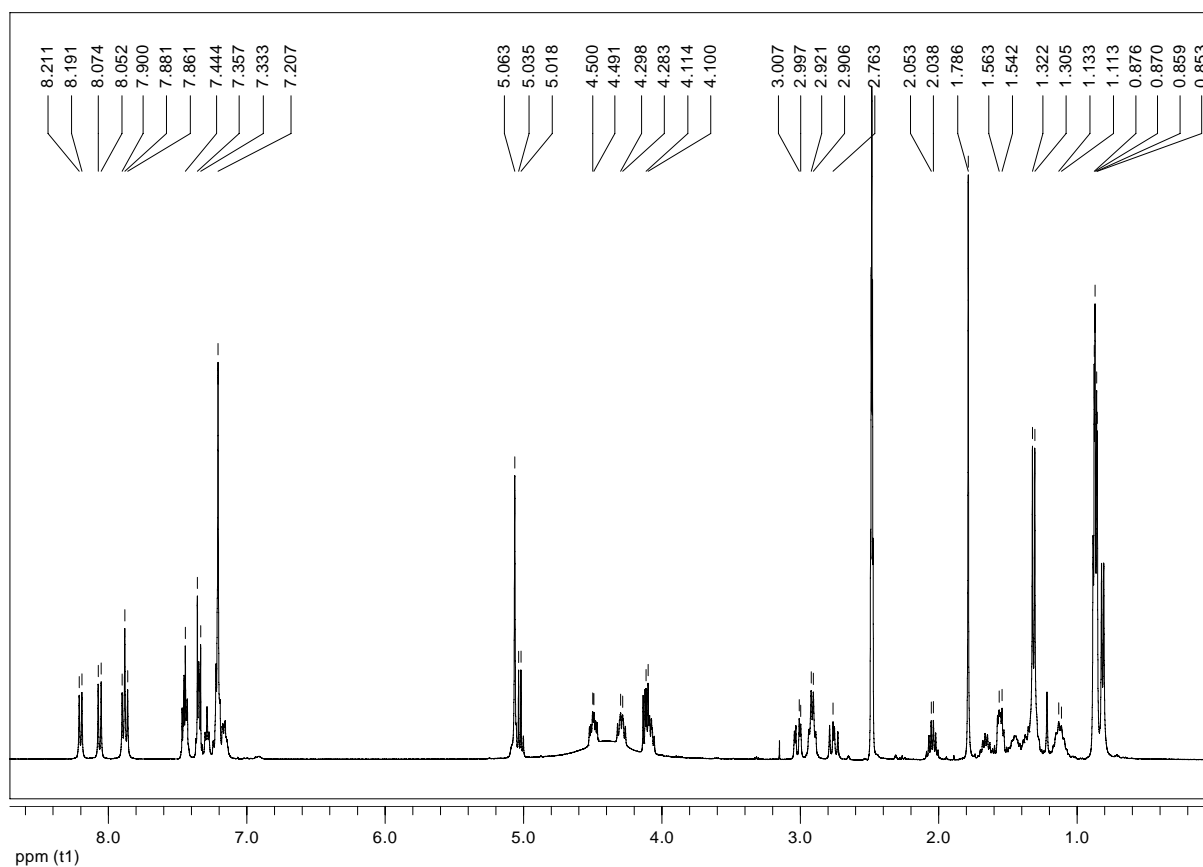

$^{13}\text{C}$ -NMR of **5b** (100 MHz):

173.39, 172.27, 172.25, 171.94, 170.59, 170.05, 156.42, 138.44, 135.30, 130.35, 129.93, 129.83, 128.66, 127.98, 126.89, 70.49, 63.21, 57.59, 54.03, 53.39, 50.66, 37.81, 32.22, 30.62, 29.85, 24.69, 23.62, 23.20, 23.15, 21.84, 19.72, 18.58, 18.13.

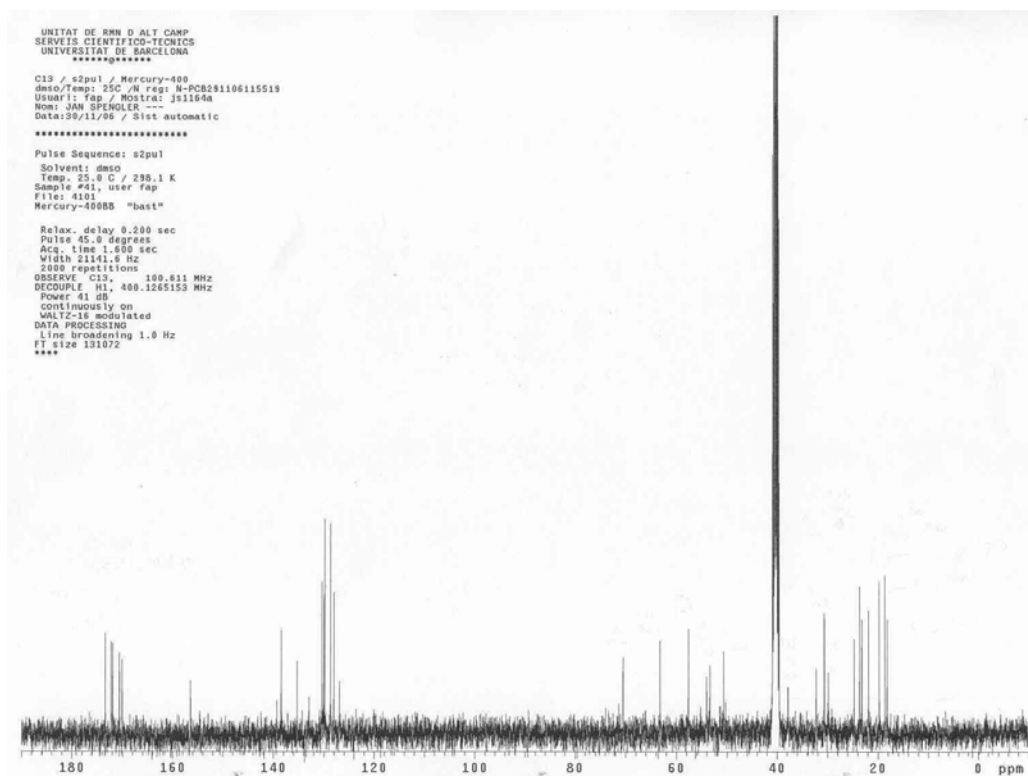

**Ac-Glu(OBzl)-Phe-Leu-Lac-Val-OH (5a):** HRMS (ESI-MS,  $ES^+$ ):  $C_{37}H_{50}N_4O_{10}$  ( $M+H^+$ )  
calcd.: 711.35997, found: 711.35844.

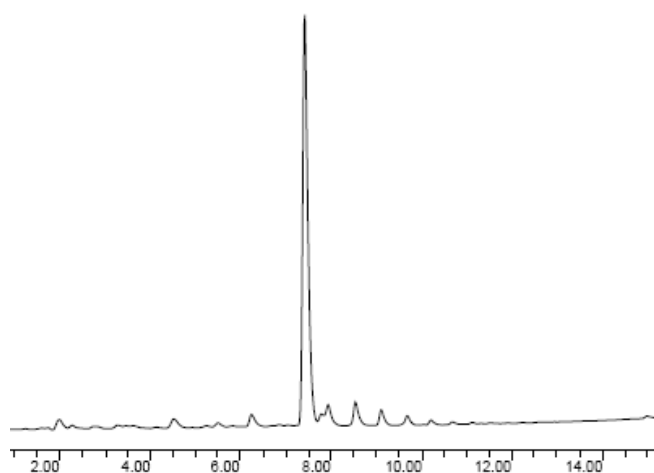

**Ac-Glu-Phe-Leu-Lac-Val-OH (6a):** HRMS (ESI-MS, ES<sup>+</sup>): C<sub>30</sub>H<sub>44</sub>N<sub>4</sub>O<sub>10</sub> (M+H<sup>+</sup>) calcd.: 621.31302, found: 621.31208.

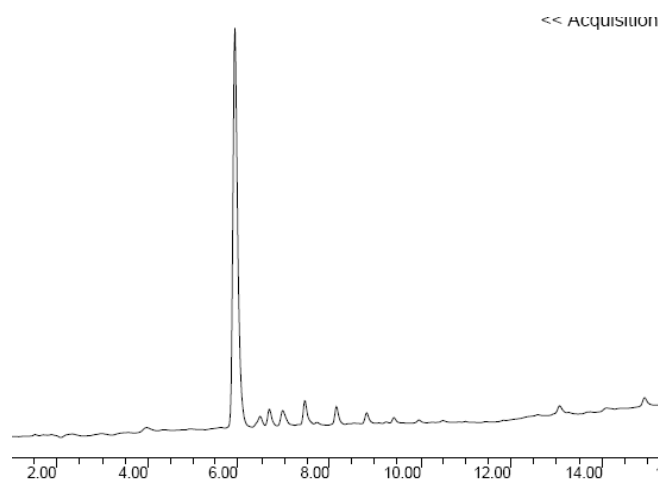

**Ac-Lys-Phe-Leu-Lac-Val-OH (6b):** HRMS (ESI-MS, ES<sup>+</sup>): C<sub>31</sub>H<sub>49</sub>N<sub>5</sub>O<sub>8</sub> (M+H<sup>+</sup>) calcd.: 621.34941, found: 621.36843.

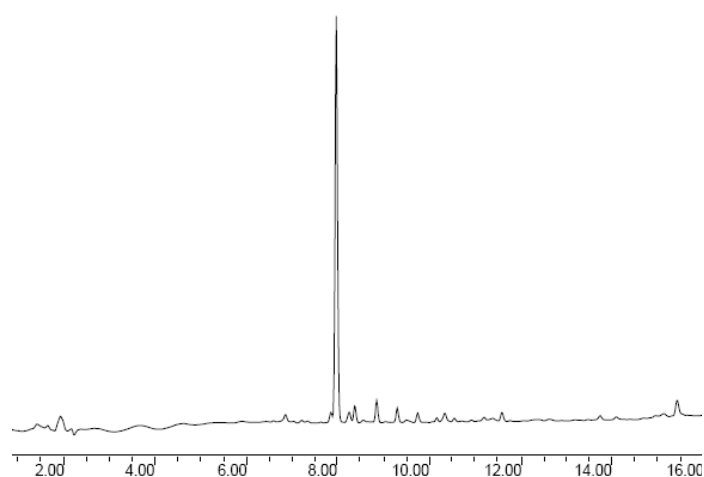

**Ac-Thr(Bzl)-Phe-Leu-Lac-Val-OH (5c):** HRMS (ESI-MS, ES<sup>+</sup>): C<sub>36</sub>H<sub>50</sub>N<sub>4</sub>O<sub>9</sub> (M+H<sup>+</sup>) calcd.: 683.36506, found: 683.36511.

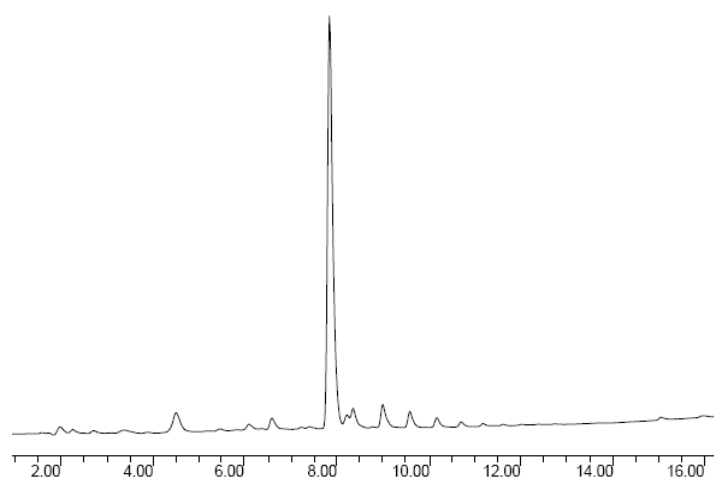



**Ac-Thr-Phe-Leu-Lac-Val-OH (6c):** HRMS (ESI-MS, ES<sup>+</sup>): C<sub>29</sub>H<sub>44</sub>N<sub>4</sub>O<sub>9</sub> (M+H<sup>+</sup>) calcd.: 593.31811, found: 593.31692.

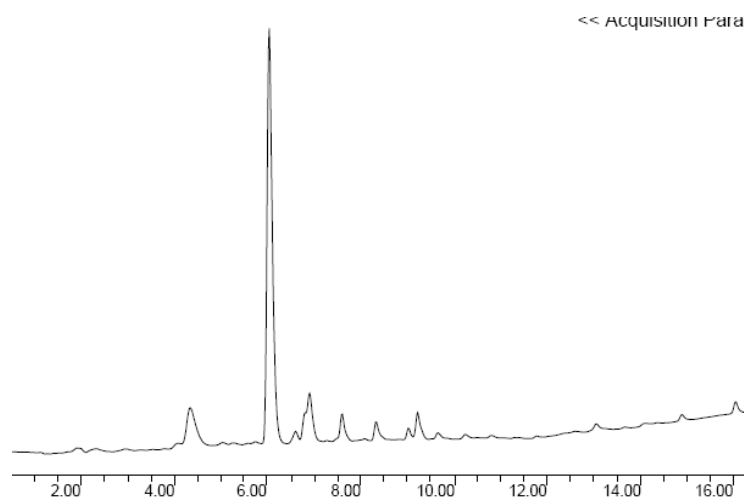

**Ac-Tyr(Bzl)-Phe-Leu-Lac-Val-OH (5d):** HRMS (ESI-MS, ES<sup>+</sup>): C<sub>41</sub>H<sub>52</sub>N<sub>4</sub>O<sub>9</sub> (M+H<sup>+</sup>) calcd.: 745.38071, found: 745.38043.

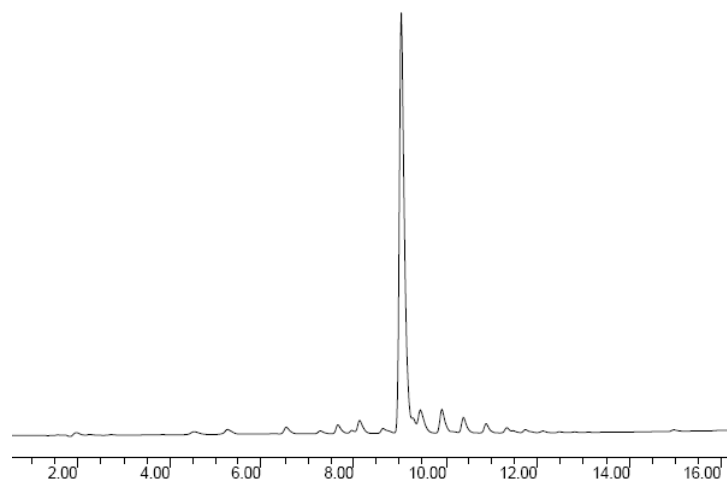

**Ac-Tyr-Phe-Leu-Lac-Val-OH (6d):** HRMS (ESI-MS, ES<sup>+</sup>): C<sub>34</sub>H<sub>46</sub>N<sub>4</sub>O<sub>9</sub> (M+H<sup>+</sup>) calcd.: 655.33376, found: 655.33270.

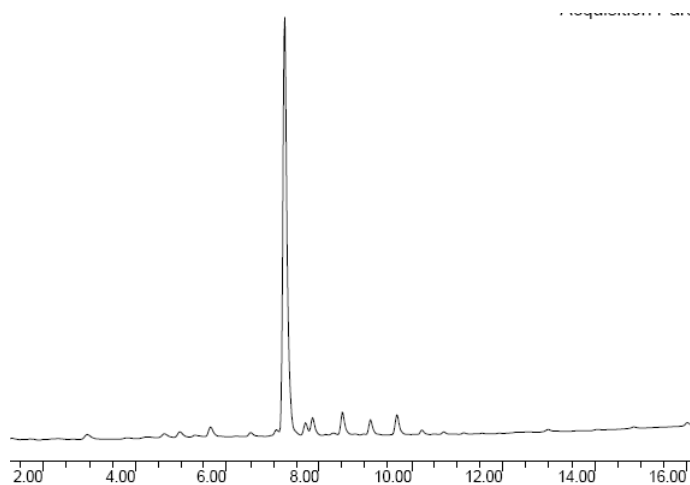

**Ac-Cys(pMeBzl)-Phe-Leu-Lac-Val-OH (5e):** HRMS (ESI-MS, ES<sup>+</sup>): C<sub>36</sub>H<sub>50</sub>N<sub>4</sub>O<sub>8</sub>S (M+H<sup>+</sup>) calcd.: 699.34221, found: 699.34108.

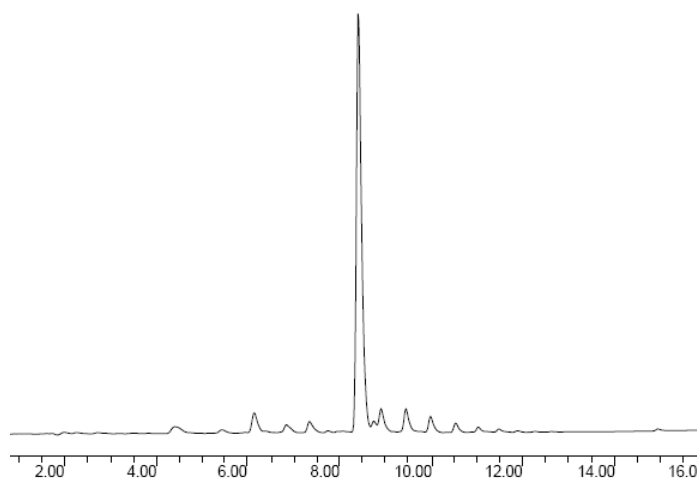

**Ac-Cys-Phe-Leu-Lac-Val-OH (6e):** HRMS (ESI-MS, ES<sup>+</sup>): C<sub>28</sub>H<sub>42</sub>N<sub>4</sub>O<sub>8</sub>S (M+H<sup>+</sup>) calcd.: 595.27961, found: 595.27728.

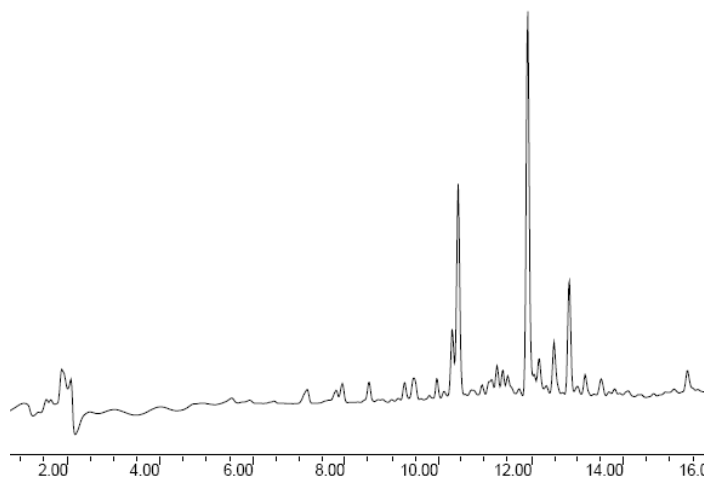

**Ac-Arg(Tos)-Phe-Leu-Lac-Val-OH 5f** : HRMS (ESI-MS, ES<sup>+</sup>): C<sub>38</sub>H<sub>55</sub>N<sub>7</sub>O<sub>10</sub>S (M+H<sup>+</sup>)  
calcd.: 802.38039, found: 802.38051.

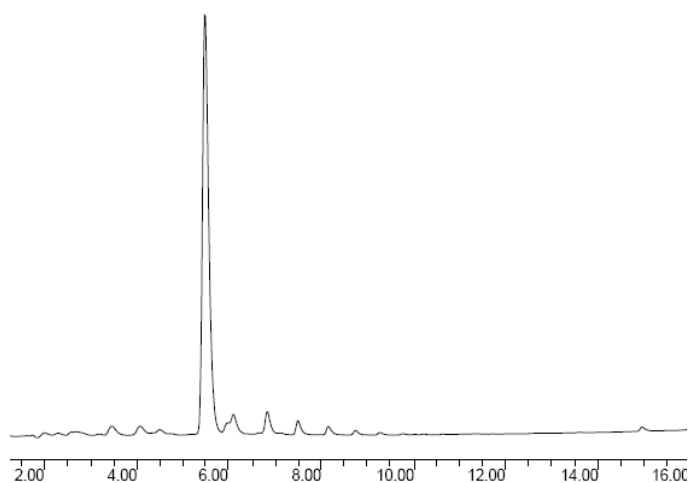

**Ac-Arg-Phe-Leu-Lac-Val-OH 6f** : HRMS (ESI-MS, ES<sup>+</sup>): C<sub>31</sub>H<sub>49</sub>N<sub>7</sub>O<sub>8</sub> (M+H<sup>+</sup>) calcd.:  
648.37154, found: 648.37143.

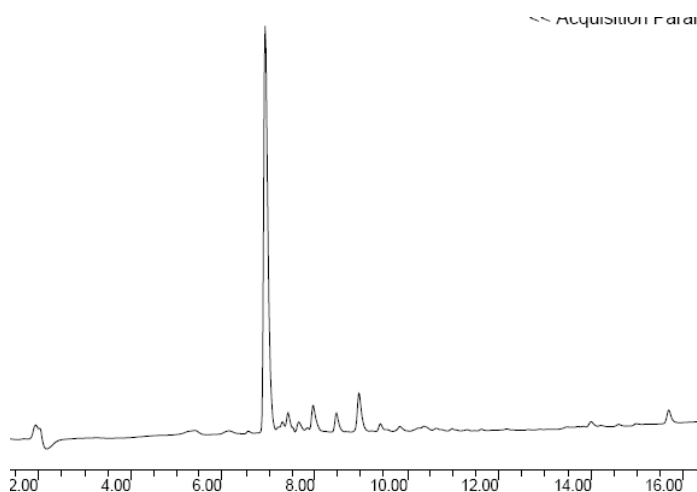

**Ac-Asn(Xan)-Phe-Leu-Lac-Val-OH 5g** : HRMS (ESI-MS, ES<sup>+</sup>): C<sub>29</sub>H<sub>43</sub>N<sub>5</sub>O<sub>9</sub> (M+H<sup>+</sup>)  
calcd.: 606.31335, found: 606.31338.

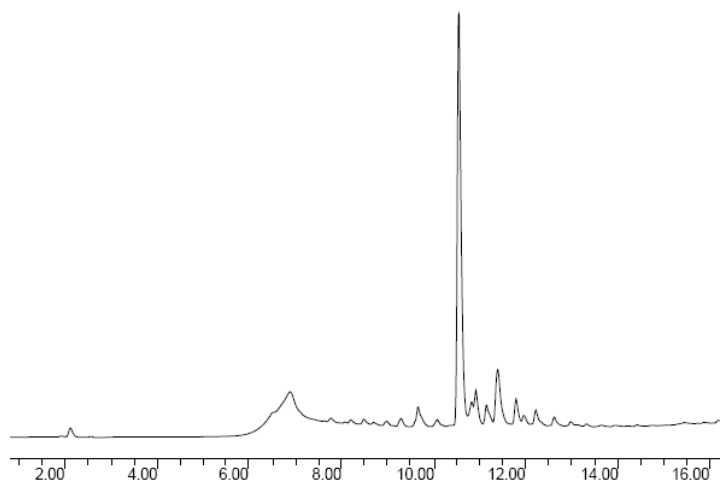

### Quantification of resin functionalization

The Fmoc-group was cleaved with 20% piperidine in DMF (3 x 5 min). The solutions were diluted with DMF and UV-absorbance at 290 nm was measured.

---

<sup>1</sup> Fosdick, L. S.; Wessinger, G. D. *J. Am. Chem. Soc.* **1938**, *60*, 1465-1466.

<sup>2</sup> Pumpor, K.; Windeisen, E.; Burger K. *J. Heterocyclic Chem.* **2003**, *40*, 435-442.

<sup>3</sup> Gairi, M.; Lloyd-Williams, P.; Albericio, F.; Giralt, E. *Tetrahedron Lett.* **1990**, *31*, 7363-7366.
